# Supplementary material
Source: PubMed Central journal article supplement (PMC5119014)
Supplement: AAC.01172-16_zac012165762so1.pdf [file AAC.01172-16_zac012165762so1.pdf]

Supplementary Figure 1. Median [5<sup>th</sup> and 95<sup>th</sup> percentile] area under the curve over 24 hours (after the third dose in mg/kg) observed (Bayesian) in the patients (n=18), model simulated values (n=5000), and predicted (Bayesian) values using the external validation dataset (n=5)

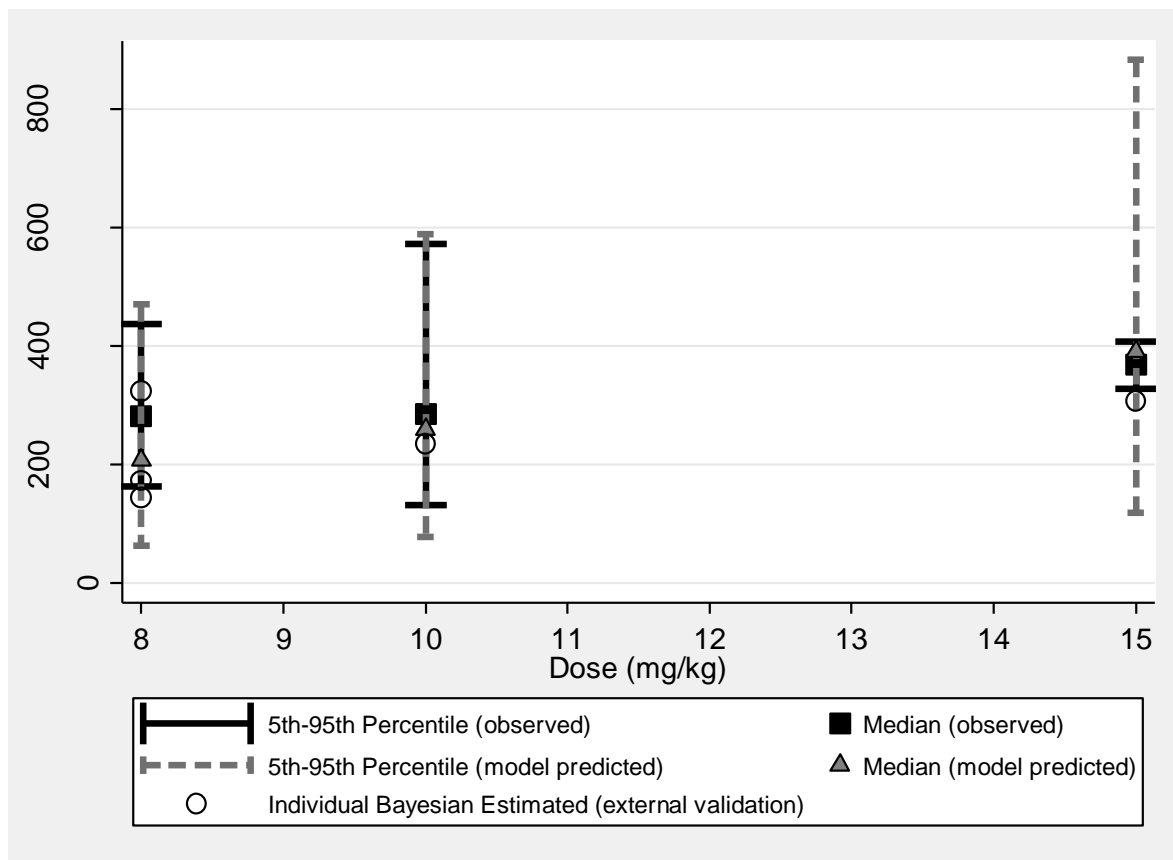

Supplementary Figure 2. Scatter plot of the ratio of maximum change in laboratory measures of liver injury and function relative to the observed micafungin area under the curve (A) and treatment duration (B)

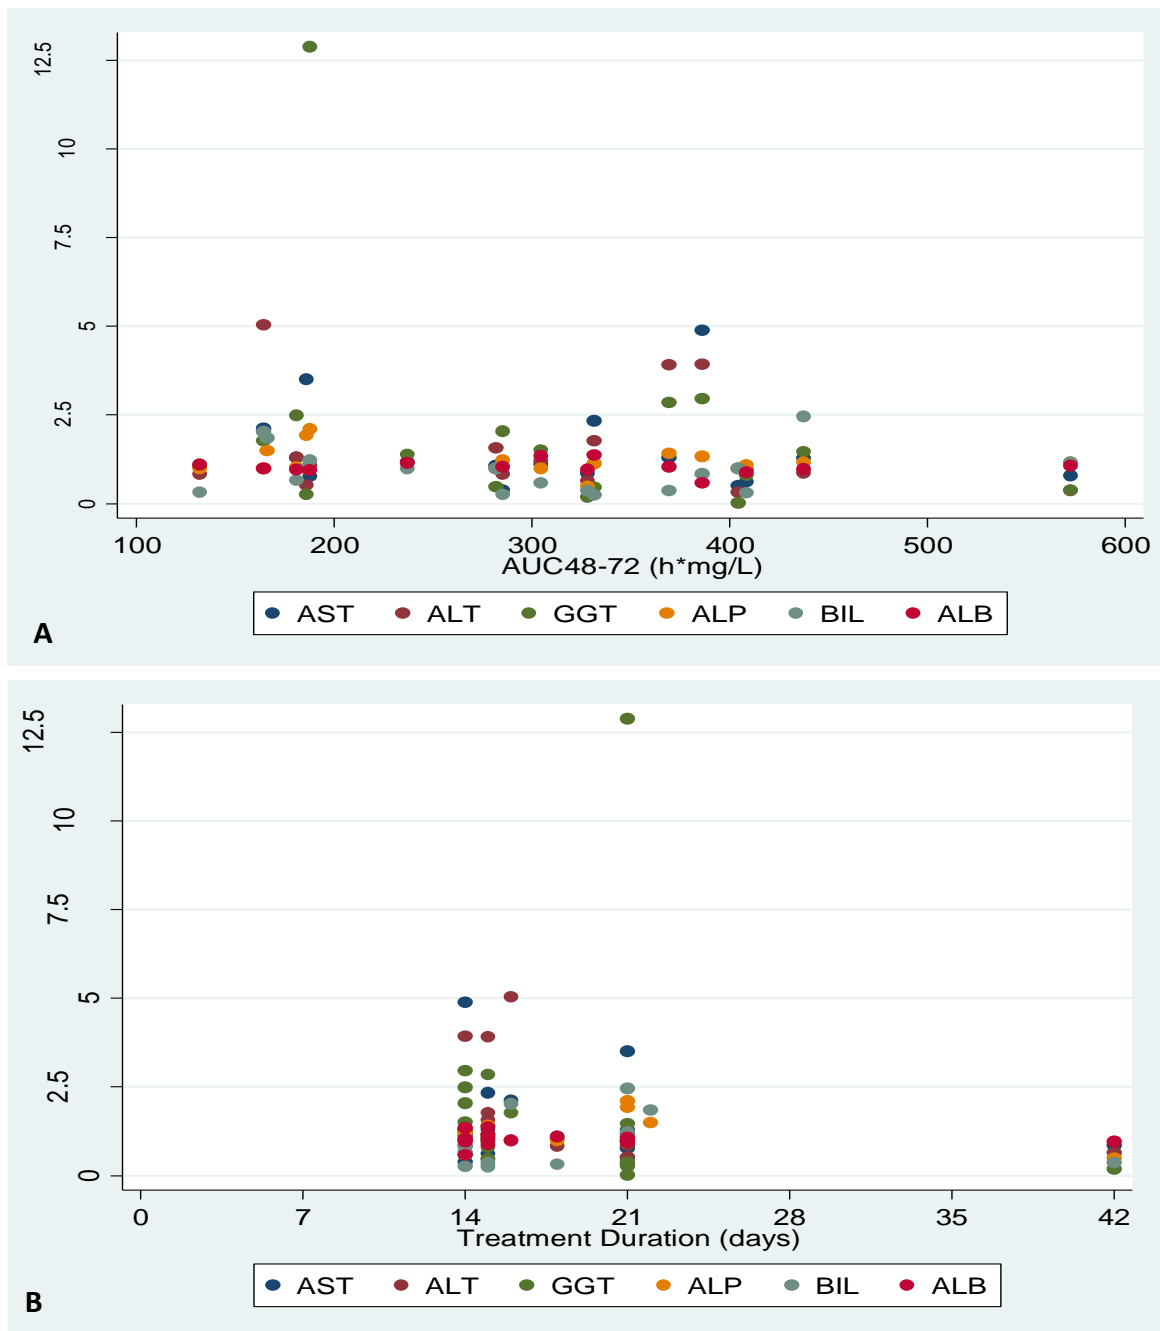

Legend: AST, aspartate aminotransferase; ALT, alanine aminotransferase; GGT, gamma-glutamyl transferase, ALP; alkaline phosphatase; BIL, total bilirubin, ALB, albumin
